# Supplementary material for: Structure, magnetism and optical properties of achiral and chiral two-dimensional oxalate-bridged anionic networks with symmetric and asymmetric ammonium cations
Source: Royal Society of Chemistry journal article supplement (doi:10.1039/b506671a), 2005-01-01
Supplement: b506671a2.pdf [file b506671a2.pdf]

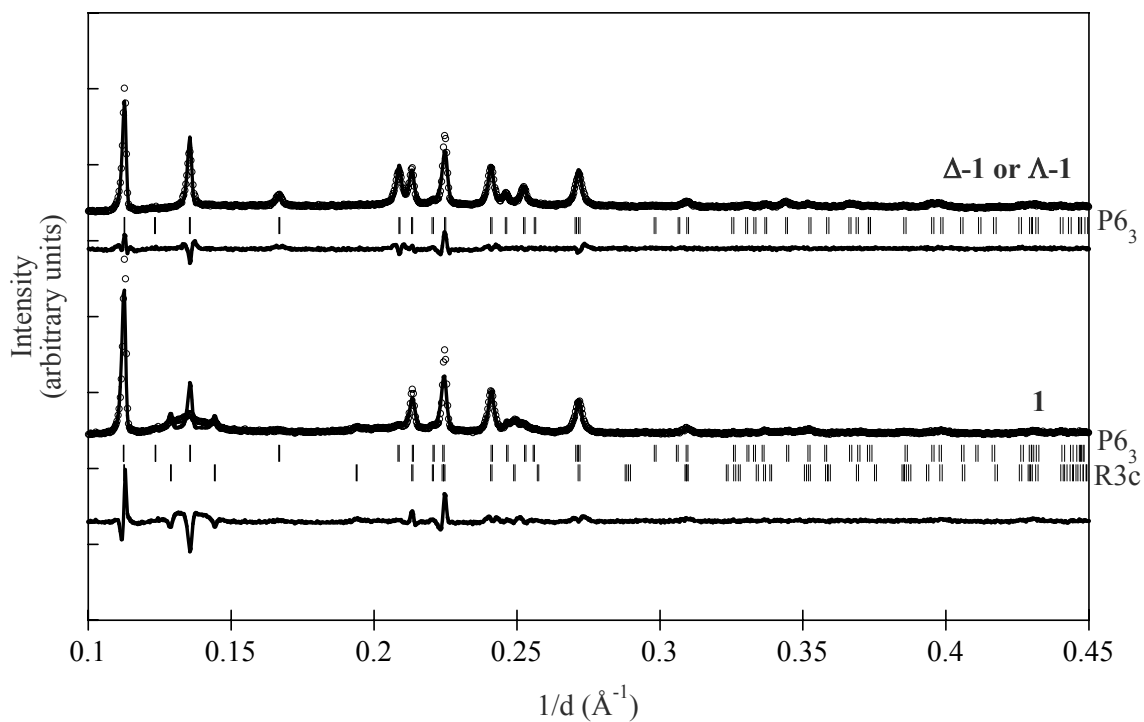

**Fig. 1** : X-ray powder diffraction patterns of **1** ( $[\text{N}(\text{n-C}_4\text{H}_9)_4][\text{Mn}^{\text{II}}\text{Cr}^{\text{III}}(\text{C}_2\text{O}_4^{2-})_3]$ ), ( $\Delta$ )- or ( $\Lambda$ )-**1**. Circles correspond to the observed profile and full curve to the calculated one. The short vertical lines below the profile curves mark the positions of all Bragg reflections. The lower curves show the difference between observed and calculated profiles.

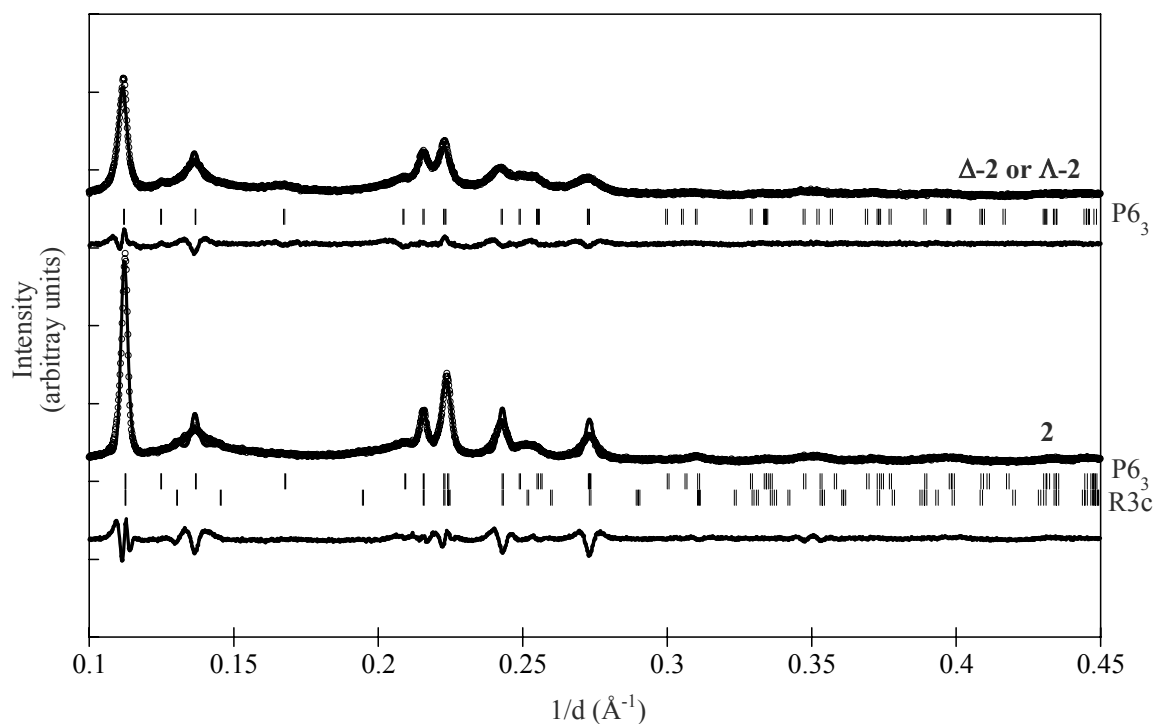

**Fig. 2 :** X-ray powder diffraction patterns of **2** ( $[\text{N}(\text{n-C}_4\text{H}_9)_4][\text{Fe}^{\text{II}}\text{Cr}^{\text{III}}(\text{C}_2\text{O}_4^{2-})_3]$ ), ( $\Delta$ )- or ( $\Lambda$ )-**2**. Circles correspond to the observed profile and full curve to the calculated one. The short vertical lines below the profile curves mark the positions of all Bragg reflections. The lower curves show the difference between observed and calculated profiles.
