# Supplementary figures and images for: Structure, magnetism and optical properties of achiral and chiral two-dimensional oxalate-bridged anionic networks with symmetric and asymmetric ammonium cations
Source: Royal Society of Chemistry journal article supplement (doi:10.1039/b506671a), 2005-01-01

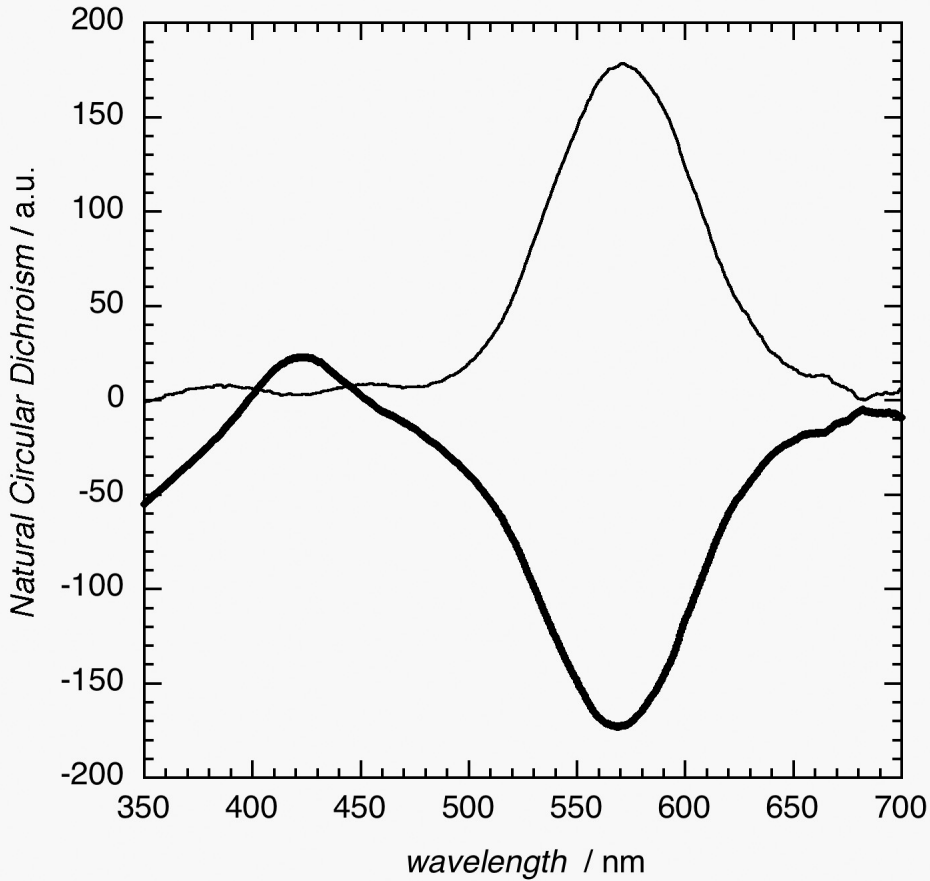

Supplement: b506671a1.pdf [file b506671a1.pdf]
